# Supplementary material
Source: Research Square preprint supplement (doi:10.21203/rs.3.rs-9161236/v1)
Supplement: Supplementary file 1 [file 7551f0ece6d5349fe736a173.docx]

**Supplementary Tables**

**Supplementary Table 1.** Correlation Coefficients between All Muscle Measures (DXA and US) and Functional Performance (Sit-to-Stand Time, s), Stratified by Sex.

| Variable (Correlation with Sit-to-Stand Time, s) | Total Sample (n=136) | Men (n=23) | Women (n=113) |
| --- | --- | --- | --- |
|  | Rho (p value) | Rho (p value) | Rho (p value) |
| 1. DXA |  |  |  |
| Total Lean Mass (kg) | 0.269 (0.002) | 0.209 (0.354) | 0.276 (0.003) |
| Leg Lean Mass (kg) | 0.206 (0.019) | 0.146 (0.511) | 0.224 (0.017) |
| Appendicular Lean Mass (kg) | 0.260 (0.003) | 0.180 (0.421) | 0.267 (0.004) |
| ALST/h² (kg/m²) | 0.317 (0.001) | 0.297 (0.180) | 0.334 (<0.001) |
| 2. US - Thickness |  |  |  |
| Anterior Thigh SM Thickness (cm) | - 0.293 (0.002) | - 0.228 (0.301) | - 0.330 (<0.001) |
| Thigh/Calf SM Thickness Sum (cm) | - 0.287 (0.002) | - 0.265 (0.231) | -0.301 (0.001) |

Coefficients presented are Spearman's (rho) or Pearson's r depending on the data distribution of the specific variables. ALST/h²: Appendicular Lean Soft Tissue Index, derived from DXA (Dual Energy X-ray Absorptiometry). US: Ultrasound. SM: Skeletal Muscle. P values < 0.05 were considered statistically significant.

**Supplementary Table 2.** Comparison of Functional Performance (Sit-to-Stand Time, s) by Quartile Stratification of all DXA and US Muscle Measures, Stratified by Sex.

| Stratified Predictors | Sample | Quartile (Q) | N | Sit-to-Stand Time (Mean ± SD) | P (Anova) | P (*post hoc*) Q1 vs Q4 |
| --- | --- | --- | --- | --- | --- | --- |
| Total Lean Mass (kg) | Total (n= 136) | Q1 | 34 | 10.01 ± 4.09 | 0.655 | 0.518 |
| Q2 | 34 | 9.80 ±3.89 |
| Q3 | 34 | 9.55 ± 3.19 |
| Q4 | 34 | 9.01 ± 2.91 |
| Men (n=23) | Q1 | 6 | 9.82 ± 4.01 | 0.788 | 0.692 |
| Q2 | 6 | 9.01 ± 3.10 |
| Q3 | 6 | 9.61 ± 3.29 |
| Q4 | 5 | 9.45 ± 4.01 |
| Women (n= 113) | Q1 | 29 | 10.05 ± 3.99 | 0.041 | 0.022 |
| Q2 | 28 | 10.91 ± 4.11 |
| Q3 | 28 | 9.41 ± 3.19 |
| Q4 | 28 | 8.82 ± 2.91 |
| Leg Lean Mass (kg) | Total (n= 136) | Q1 | 34 | 10.11 ± 4.11 | 0.702 | 0.601 |
| Q2 | 34 | 9.92 ± 3.99 |
| Q3 | 34 | 9.61 ± 3.11 |
| Q4 | 34 | 9.08 ± 2.95 |
| Men (n=23) | Q1 | 6 | 9.91 ± 4.02 | 0.812 | 0.711 |
| Q2 | 6 | 9.05 ± 3.19 |
| Q3 | 6 | 9.71 ± 3.21 |
| Q4 | 5 | 9.51 ± 4.09 |
| Women (n= 113) | Q1 | 29 | 10.15 ± 4.02 | 0.045 | 0.029 |
| Q2 | 28 | 10.95 ± 4.19 |
| Q3 | 28 | 9.45 ± 3.25 |
| Q4 | 28 | 8.85 ± 2.95 |
| Appendicular Lean Mass (kg) | Total (n= 136) | Q1 | 34 | 10.09 ± 4.05 | 0.699 | 0.589 |
| Q2 | 34 | 9.89 ± 3.85 |
| Q3 | 34 | 9.59 ± 3.05 |
| Q4 | 34 | 9.05 ± 2.90 |
| Men (n=23) | Q1 | 6 | 9.89 ± 4.05 | 0.795 | 0.701 |
| Q2 | 6 | 9.09 ± 3.15 |
| Q3 | 6 | 9.69 ± 3.25 |
| Q4 | 5 | 9.50 ± 4.05 |
| Women (n= 113) | Q1 | 29 | 10.11 ± 4.05 | 0.043 | 0.025 |
| Q2 | 28 | 10.93 ± 4.15 |
| Q3 | 28 | 9.43 ± 3.23 |
| Q4 | 28 | 8.83 ± 2.93 |
| ALST/h² (kg/m²) | Total (n= 136) | Q1 | 34 | 10.04 ± 4.01 | 0.071 | 0.053 |
| Q2 | 34 | 10.02 ± 3.79 |
| Q3 | 34 | 9.36 ± 3.01 |
| Q4 | 34 | 8.72 ± 2.89 |
| Men (n=23) | Q1 | 6 | 9.92 ± 4.19 | 0.672 | 0.942 |
| Q2 | 6 | 8.69 ± 2.91 |
| Q3 | 6 | 9.51 ± 3.23 |
| Q4 | 5 | 9.70 ± 4.20 |
| Women (n= 113) | Q1 | 29 | 10.07 ± 4.09 | 0.038 | 0.016 |
| Q2 | 28 | 10.87 ± 4.09 |
| Q3 | 28 | 9.38 ± 3.19 |
| Q4 | 28 | 8.80 ± 2.87 |
| Anterior Thigh SM Thickness (cm) | Total (n= 136) | Q1 | 34 | 10.02 ± 3.99 | 0.049 | 0.033 |
| Q2 | 34 | 9.82 ± 3.5 |
| Q3 | 34 | 9.45 ± 3.09 |
| Q4 | 34 | 8.61 ± 2.76 |
| Men (n=23) | Q1 | 6 | 10.02 ± 4.11 | 0.801 | 0.789 |
| Q2 | 6 | 9.11 ± 3.01 |
| Q3 | 6 | 9.76 ± 3.82 |
| Q4 | 5 | 8.95 ± 3.09 |
| Women (n= 113) | Q1 | 29 | 10.81 ± 3.99 | 0.026 | 0.009 |
| Q2 | 28 | 9.96 ± 3.79 |
| Q3 | 28 | 9.21 ± 3.03 |
| Q4 | 28 | 8.59 ± 2.76 |
| Thigh/Calf SM Sum (cm) | Total (n= 136) | Q1 | 34 | 10.08 ± 4.09 | 0.688 | 0.579 |
| Q2 | 34 | 9.88 ± 3.89 |
| Q3 | 34 | 9.58 ± 3.19 |
| Q4 | 34 | 9.04 ± 2.91 |
| Men (n=23) | Q1 | 6 | 9.88 ± 4.09 | 0.799 | 0.705 |
| Q2 | 6 | 9.08 ± 3.19 |
| Q3 | 6 | 9.68 ± 3.29 |
| Q4 | 5 | 9.49 ± 4.09 |
| Women (n= 113) | Q1 | 29 | 10.12 ± 4.09 | 0.044 | 0.027 |
| Q2 | 28 | 10.94 ± 4.19 |
| Q3 | 28 | 9.44 ± 3.29 |
| Q4 | 28 | 8.84 ± 2.91 |

ALST/h²: Appendicular Lean Soft Tissue Index, derived from DXA (Dual Energy X-ray Absorptiometry). US: Ultrasound. SM: Skeletal Muscle. LST: Lean Soft Tissue. ALST: Appendicular Lean Soft Tissue. ALST/h²: Appendicular Lean Soft Tissue Index (ALST/height²; kg/m²). P (Anova): Test for difference in the mean Sit-to-Stand Time among the four quartiles (Q1, Q2, Q3, Q4) of the muscle mass predictor.

**Supplementary Table 3. Contingency matrix for muscle mass quartile classification between DXA and ultrasound (n=136)**

|  | US - Thickness | | | | |
| --- | --- | --- | --- | --- | --- |
| DXA- ALST/h² | Q1, n (%) | Q2, n (%) | Q3, n (%) | Q4, n (%) | Total- n (%) |
| Q1, n (%) | **9 (6.6)** | 8 (5.9) | 8 (5.9) | 10 (7.3) | 35 (25.7) |
| Q2, n (%) | 9 (6.6) | **17 (12.5)** | 4 (2.9) | 8 (5.9) | 38 (28.0) |
| Q3, n (%) | 7 (5.1) | 8 (5.9) | **3 (2.2)** | 8 (5.9) | 26 (19.1) |
| Q4, n (%) | 6 (4.4) | 9 (6.6) | 7 (5.1) | **15 (11.0)** | 37 (27.2) |
| Total, n (%) | 31 (22.8) | 42 (30.9) | 22 (16.2) | 41 (30.1) | 136 (100) |

ALST/h²: Data are expressed as absolute frequency and total percentage [n (%)]. Values in **bold** represent exact agreement between methods (n=44; 32.3%). Cohen’s Kappa = 0.088 (p=0.077); Linear Weighted Kappa = 0.100 (p=0.112). Appendicular Lean Soft Tissue Index, derived from DXA (Dual Energy X-ray Absorptiometry). US: Ultrasound.
